# Supplementary material
Source: bioRxiv or medRxiv preprint supplement (https://www.biorxiv.org/highwire/filestream/42242/field_highwire_adjunct_files/1/142943-2.pdf)
Supplement: Supplementary file [file 142943-2.pdf]

## Supplementary Figure Legends

1

### Supplementary Figure 1: Highly efficient transdifferentiation of MEFs into

2

melanocyte-like cells by MITF (a) Brightfield images of ESCs prior to Dox induction

3

and at day 12 post Dox induction. (b) MITF protein levels in MEFs at different time

4

points post Dox induction. (c) *Mitf*, *Tyrp1*, *Tyrosinase*, *Trpm1*, and *Tyrp2* mRNA

5

levels in MEFs at different time points post Dox induction compared to vehicle-

6

treated cells. Levels were normalized to *Gapdh*, and fold changes relative to control

7

are shown. Error bars represent  $\pm$  SEM. \* indicates  $p < 0.05$  ( $n = 3$ ). (d) MITF and

8

TYR protein levels in *Mitf* knock in ESCs and *Mitf* knock in MEFs at day 12 post

9

Dox induction (e) Immunostaining of MITF (green) and TYRP1 (green) in MEFs at

10

day 12 post Dox induction. DAPI-stained nuclei appear blue. (f) Green pixel

11

quantification for MITF-positive cells compared to DAPI-stained nuclei was made

12

using ImageJ software and quantification for TYRP1-positive staining was made by

13

counting the whole field. An average number of 30 cells were taken from each field,

14

with two fields analyzed for each group.

15

### Supplementary Figure 2: OCT4 transfection efficiency. MEFs were transfected

16

with a plasmid for expression of OCT4 or empty vector as control. Left:

17

Immunostaining of OCT4-flag (green) performed at day 6 post Dox induction. DAPI-

18

stained nuclei appear blue (left panel). Right: *OCT4* mRNA level at day 6 post

19

transfection. Levels were normalized to *Gapdh*, and fold changes relative to control

20

are shown. Error bars represent  $\pm$  SEM. \* indicates  $p < 0.05$  ( $n = 3$ ). Error bars

21

represent  $\pm$  SEM.

22

### Supplementary Figure 3: OCT4 interferes with MITF transcriptional activity.

23

(a) Upper: HEK293T cells were co-transfected with luciferase reporter driven by the

24

*mMLANA* promoter and with plasmids for expression of MITF, OCT4, or empty

25

plasmid as control. Lower: WM3682 cells were co-transfected with luciferase reporter

26

driven by the *mMLANA* promoter and with either OCT4 expression plasmid or empty

27

plasmid as control. Luciferase activity was normalized to *Renilla* luciferase activity.

28

Fold changes relative to control are shown. Error bars represent  $\pm$  SEM, \* indicates  $p$

29

$< 0.05$  ( $n = 3$ ). (b) Upper: HEK293T cells were co-transfected with luciferase reporter

30

driven by *TRPM1*, *TYR*, or *mMLANA* promoter and with plasmids for expression of

31

MITF, SOX2, or NANOG or empty plasmid as control. Lower: WM3682 cells were co-transfected with luciferase reporter driven by *TRPM1*, *TYR*, or *mMLANA* promoter and with SOX2 or NANOG expression plasmids or empty plasmid as control. Luciferase activity was normalized to *Renilla* luciferase activity. Fold changes relative to control are shown. Error bars represent  $\pm$  SEM, \* indicates  $p < 0.05$  ( $n = 3$ ). (c) Co-immunoprecipitation assay of MITF and OCT4 using protein extracts from melanoma WM3682 cells transfected with OCT4-flag. Samples were precipitated using anti-MITF antibody. Anti-flag was used for western blot. (d) A probe corresponding to the E-box region of the *TRPM1* promoter was used in EMSA to test *in vitro* binding of MITF to this sequence. Polyclonal anti-MITF antibody was used for supershift analysis. MITF bound probes and free probe are marked with arrows.

**Supplementary Figure 4: OCT4 and MITF are inversely correlated in melanoma cell lines and patients.** (a) *MITF* and *OCT4* expression in melanoma cell lines. (b) Visualization of genetic alterations in melanoma related to MITF and OCT4 based on TCGA database using cBioPortal site for Cancer Genomics.

**Supplementary Figure 5: OCT4, E2F7, or P53 and MITF overlapping ChIP-seq peaks.** (a) Venn diagrams representing the number of unique gene promoters bound by E2F7 and MITF (ChIP-seq originated from melanoma cells) and the overlap between them based on ChIP-seq peaks. (b) A view of the selected biological pathways enriched within the overlapped gene set. (c) Venn diagrams representing the number of unique gene promoters and the overlap of MITF (ChIP-seq originated from normal melanocytes) with OCT4, P53, and E2F7. (d) Selected biological pathways identified by GO enrichment analysis of genes bound by both OCT4 and MITF.

**Supplementary Figure 6: OCT4, SOX2, NANOG, and lineage transcription factor overlap.** Right: Venn diagrams representing the number of gene promoters bound by OCT4, SOX2, NANOG, and the specified lineage transcription factors and the overlap between them based on ChIP-seq peaks. Left: Number of gene promoters that overlap between the combinations for each pair of OCT4, SOX2, and NANOG.

**Supplementary Figure 7: Schematic illustration of the discussed cell fate conversions.** Schematic representation of the roles of OCT4 and MITF in the three routes of cell fate conversions described herein.
